# Supplementary material for: Stand-Alone CuFeSe2 (Eskebornite) Nanosheets for Photothermal Cancer Therapy
Source: MDPI journal article supplement (doi:10.3390/nano11082008), 2021-08-05
Supplement: s1 [file s1]

## Supplementary Materials

# Stand-Alone CuFeSe<sub>2</sub> (Eskebornite) Nanosheets for Photothermal Cancer Therapy

Mimi Liu <sup>1</sup>, Daniela R. Radu <sup>1</sup>, Gurpreet Singh Selopal <sup>2</sup>, Saiphaneendra Bachu <sup>3</sup> and Cheng-Yu Lai <sup>1,\*</sup>

<sup>1</sup> Department of Mechanical and Materials Engineering, Florida International University, Miami, FL 33199, USA; mliu@fiu.edu (M.L.); dradu@fiu.edu (D.R.R.)

<sup>2</sup> Centre Énergie Matériaux Télécommunications (INRS-EMT), Institut National de la Recherche Scientifique, Varennes, QC J3X 1S2, Canada; gurpreet.selopal@inrs.ca

<sup>3</sup> Department of Materials Science and Engineering, The Pennsylvania State University, University Park, PA 16802, USA; sbachu@psu.edu (S.B.)

\* Correspondence: clai@fiu.edu

**1. Photothermal conversion efficiency.** The photothermal conversion efficiency of CFS-S was evaluated using the following equation:<sup>1,2</sup>

$$\eta = \frac{hS(T_{max} - T_{surr}) - Q_D}{I(1 - 10^{-A})}$$

where  $h$  is the heat transfer coefficient,  $S$  the surface area of the container;  $T_{max}$  is the equilibrium maximum temperature,  $T_{surr}$  is the surrounding ambient temperature, and  $Q_D$  expresses heat dissipated from light absorbed by the solvent and the container.  $I$  is the laser power (1 W/cm<sup>2</sup>); and  $A$  is the absorbance of CFS-S at 808 nm (0.33).  $Q_D$  was measured independently to be 28.2 mW using pure water without CFS-S. Herein,  $hS$  is derived according to the following equation:

$$\tau_s = \frac{m_D C_D}{hS}$$

where  $m_D$  and  $C_D$  are the mass (0.3 g) and heat capacity (4.2 J/g) of deionized water, respectively.  $\tau_s$  is the sample system time constant which can be calculated based on the following equation:

$$t = -\tau_s \ln(\theta)$$

$$\theta = \frac{T - T_{surr}}{T_{max} - T_{surr}}$$

**2. The drug (doxorubicin-DOX) loading efficiency.** The drug loading efficiency was calculated according to the following equation<sup>3</sup>:

$$\text{Loading Efficiency}(\%) = \frac{1000MV(C_0 - C_e)}{m} \times 100\%$$

where  $M$  is the molar mass of DOX;  $V$  is the volume of supernatant;  $C_0$  and  $C_e$  are the initial and equilibrium concentrations of DOX;  $m$  is the mass of CFS-S.

### 3. Materials Characterization

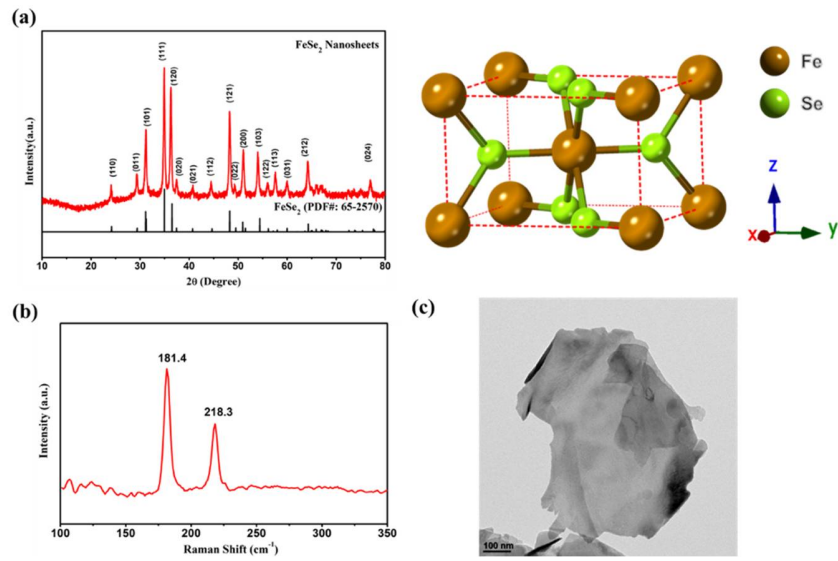

**Figure S1.** (a) XRD pattern (left) and crystal structure (right) of the synthesized FeSe<sub>2</sub> nanosheets. (b) Raman spectrum of the synthesized FeSe<sub>2</sub> nanosheets. (c) TEM images of the synthesized FeSe<sub>2</sub>.

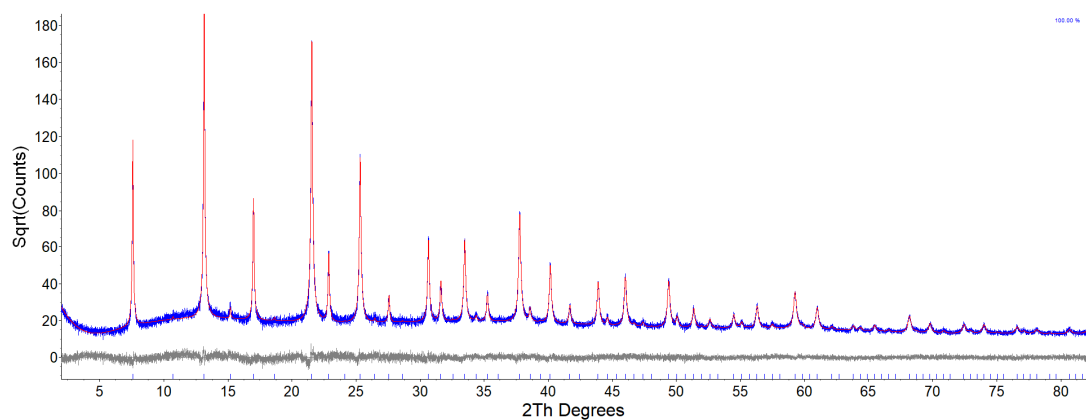

**Figure S2.** Synchrotron data for as-synthesized CuFeSe<sub>2</sub> nanosheets.

**Table S1** Crystal structural parameters of as-synthesized CuFeSe<sub>2</sub> nanosheets.

| Atom Type | X         | Y         | Z           | Occupancy | B (thermal parameter) |
|-----------|-----------|-----------|-------------|-----------|-----------------------|
| Fe        | 0         | 0         | 0           | 0.904(5)  | 0.991(1)              |
| Cu        | 0         | 0         | 0           | 0.096(5)  | 0.991(1)              |
| Cu        | 0         | 0         | 0.25        | 0.796(5)  | 0.991(1)              |
| Fe        | 0         | 0         | 0.25        | 0.204(5)  | 0.991(1)              |
| Fe        | 0         | 0.5       | -0.00224(6) | 0.64(1)   | 0.991(1)              |
| Cu        | 0         | 0.5       | -0.00224(6) | 0.36(1)   | 0.991(1)              |
| Se        | 0.2592(1) | 0.2461(1) | 0.1276(1)   | 1         | 0.991(1)              |

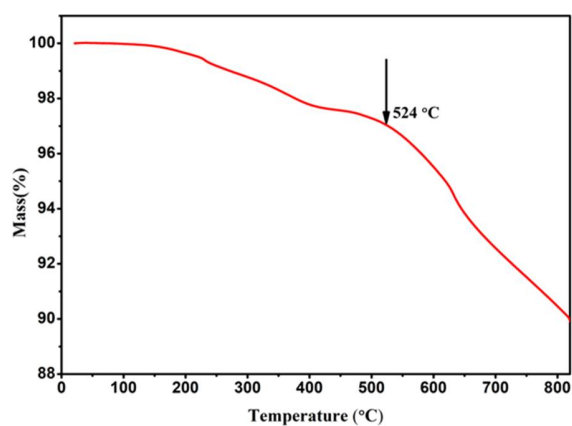

Figure S3 TGA plot of synthesized CuFeSe<sub>2</sub> nanosheets.

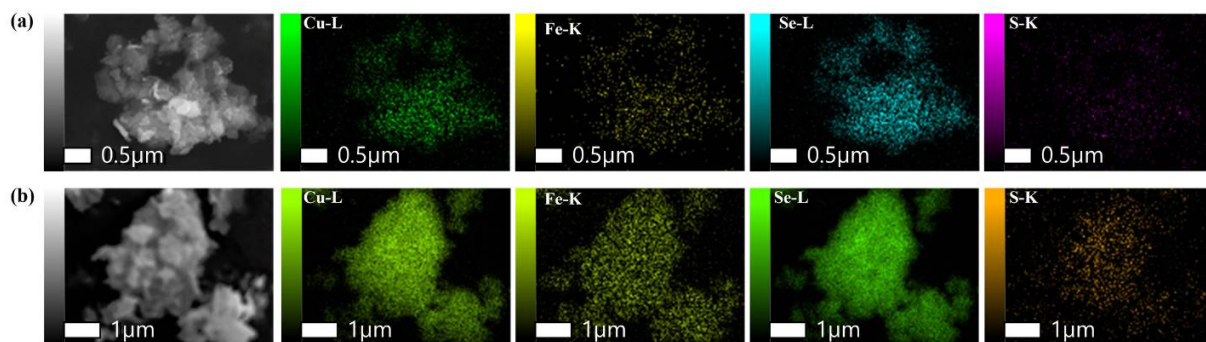

Figure S4. (a) SEM-EDS map of synthesized CuFeSe<sub>2</sub> nanosheets. (b) SEM-EDS map of CFS-S.

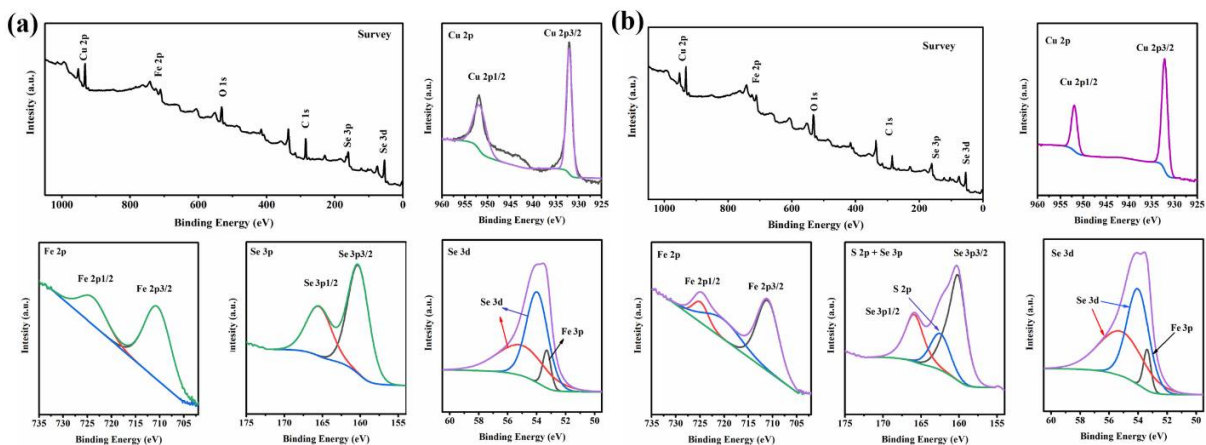

Figure S5 XPS spectra of (a) as-synthesized CuFeSe<sub>2</sub> nanosheets, (b) CFS-S nanosheets.

#### 4. Photothermal testing

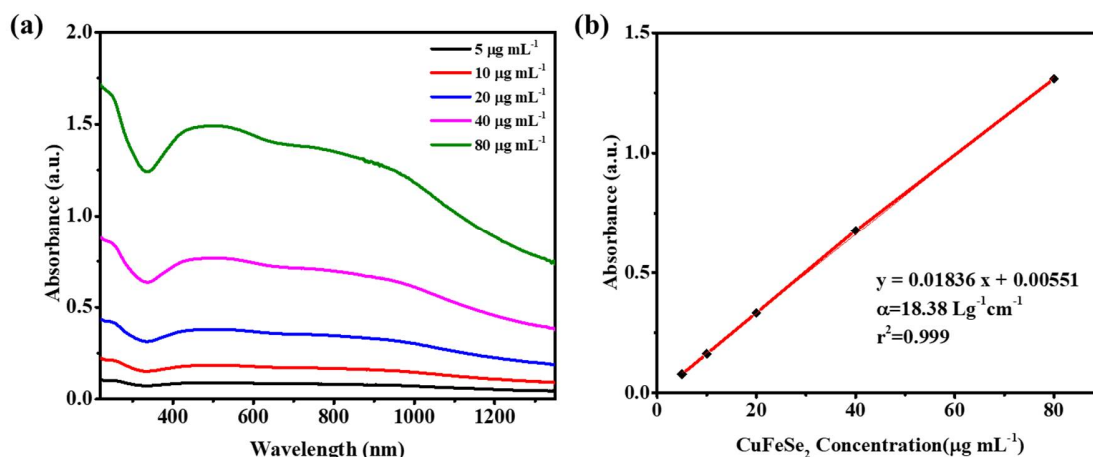

**Figure S6.** (a) UV-Vis-NIR absorption spectra of CuFeSe<sub>2</sub> solutions in different concentrations (i.e., 0, 5, 10, 20, 40, and 80 µg mL<sup>-1</sup>). (b) linear fitting curves of the absorbance at 808 nm.

**Table S 2** Drug Loading Efficiency of DOX to CFS-S.

| Ratio of DOX: CFS-S | Original DOX (mg) | Original CFS-S (mg) | DOX in supernatant (mg) | Loading Efficiency |
|---------------------|-------------------|---------------------|-------------------------|--------------------|
| 1:1                 | 4                 | 4                   | 3.032                   | 24.2%              |
| 1:2                 | 2                 | 4                   | 0.056                   | 48.6%              |
| 1:4                 | 1                 | 4                   | 0.263                   | 18.5%              |
| 1:8                 | 0.5               | 4                   | 0.142                   | 9.0%               |
| 1:16                | 0.25              | 4                   | 0.055                   | 4.89%              |

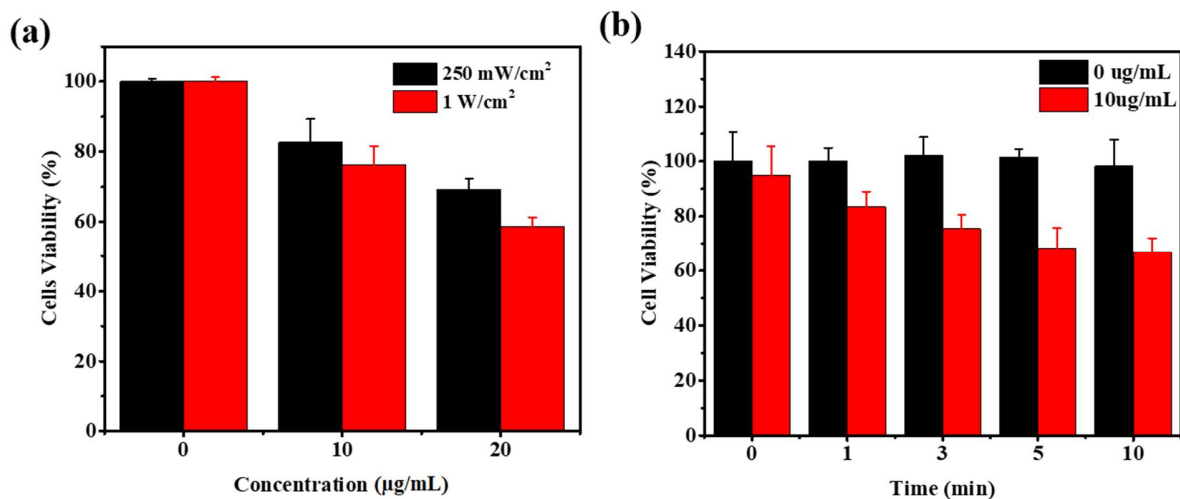

**Figure S7.** (a) Cell survival rate of Hela cells cultured with various concentrations of CFS-S nanosheets (0, 10, 20 µg/mL) and then exposed to 808 nm laser with different power density (250 mW/cm<sup>2</sup> and 1 W/cm<sup>2</sup>) for 10 minutes. (b) Cell survival rate of Hela cells cultured with various concentrations of CFS-S

nanosheets (0 and 10  $\mu\text{g/mL}$ ) and then exposed to 808 nm laser (1 W / $\text{cm}^2$ ) for different time ( 0, 1, 3, 5, 10 min).

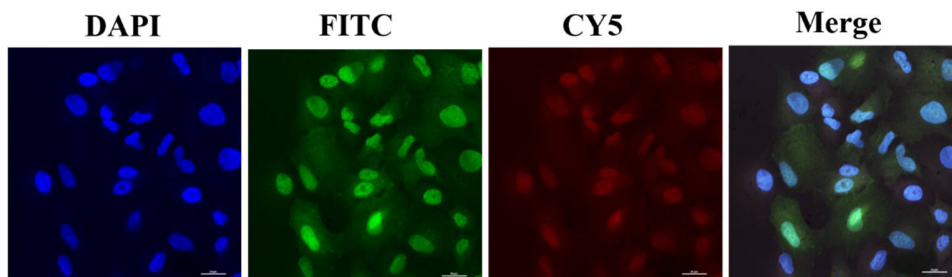

**Figure S8.** Confocal microscope images of A549GFP cells treated with CFS-S-DOX-NIR (10  $\mu\text{g/mL}$ ).

## References

- (1) Liu, X.; Li, B.; Fu, F.; Xu, K.; Zou, R.; Wang, Q.; Zhang, B.; Chen, Z.; Hu, J. Facile synthesis of biocompatible cysteine-coated CuS nanoparticles with high photothermal conversion efficiency for cancer therapy. *Dalton Transactions* **2014**, 43, 11709-11715.
- (2) Tian, Q.; Hu, J.; Zhu, Y.; Zou, R.; Chen, Z.; Yang, S.; Li, R.; Su, Q.; Han, Y.; Liu, X. Sub-10 nm  $\text{Fe}_3\text{O}_4@\text{Cu}_2\text{-xS}$  Core-Shell Nanoparticles for Dual-Modal Imaging and Photothermal Therapy. *Journal of the American Chemical Society* **2013**, 135, 8571-8577.
- (3) Yin, W.; Yan, L.; Yu, J.; Tian, G.; Zhou, L.; Zheng, X.; Zhang, X.; Yong, Y.; Li, J.; Gu, Z.; Zhao, Y. High-Throughput Synthesis of Single-Layer  $\text{MoS}_2$  Nanosheets as a Near-Infrared Photothermal-Triggered Drug Delivery for Effective Cancer Therapy. *ACS Nano* **2014**, 8, 6922-6933.
